# Supplementary material
Source: PubMed Central journal article supplement (PMC4394246)
Supplement: pnas.201406551SI.pdf [file pnas.201406551SI.pdf]

# Supporting Information

del Blanco et al. 10.1073/pnas.1406551112

## SI Materials and Methods

**OT-I Mouse Strain.** OT-I mice were described (1) and were obtained from Taconic on a *Rag2*<sup>-/-</sup> background. Animals were maintained in pathogen-free conditions within the Animal Houses at the IPBLN-CSIC. Five- to 8-wk-old mice were used in all experiments. Animal use adhered to CSIC Bioethical Guidelines.

**Characterization of J $\alpha$ 61-C $\alpha$  Transcripts.** The PCR product from the RT-qPCR obtained using the J $\alpha$ 61 and C $\alpha$  primers (Table S1) was extracted from the agarose gel by using the GeneClean Turbo kit (MP Biomedicals). The agarose-purified J $\alpha$ 61 amplified PCR product was ligated into the pGEM-T plasmid (Promega) as recommended by the manufacturer and cloned into DH5 *Escherichia coli* bacteria. Plasmid preparations from independent colonies were sequenced using a 3130XL Genetic Analyzer (Applied Biosystem). The sequences were aligned using the Pubmed Gene ID: 21473 database.

**Western Blot.** Thymocyte and T lymphocyte nuclear extracts were prepared as indicated above. Five micrograms of nuclear extract proteins were separated by 12% (wt/vol) SDS/PAGE, transferred to a nitrocellulose membrane (GE Healthcare Lifescience), and then incubated with E12 (sc-762), E47 (sc-763), or CDK9 (sc-484) Abs (Santa Cruz Biotechnology) at a 1:500 dilution. Diluted peroxidase-conjugated anti-rabbit IgG (1:500) (PerkinElmer Life Science) was used, and the bound Abs were detected using enhanced chemiluminescence (Perkin-Elmer Life Science).

**Intracellular Staining for Flow Cytometry Analysis.** Th cells were fixed and permeabilized using the BD Pharmingen Transcription Factor Buffer Set (BD Biosciences) as recommended by the manufacturer. Intracellular GATA-3 was detected by using GATA-3-PE Ab clone L50-823 (BD Biosciences).

- Hogquist KA, et al. (1994) T cell receptor antagonist peptides induce positive selection. *Cell* 76(1):17–27.

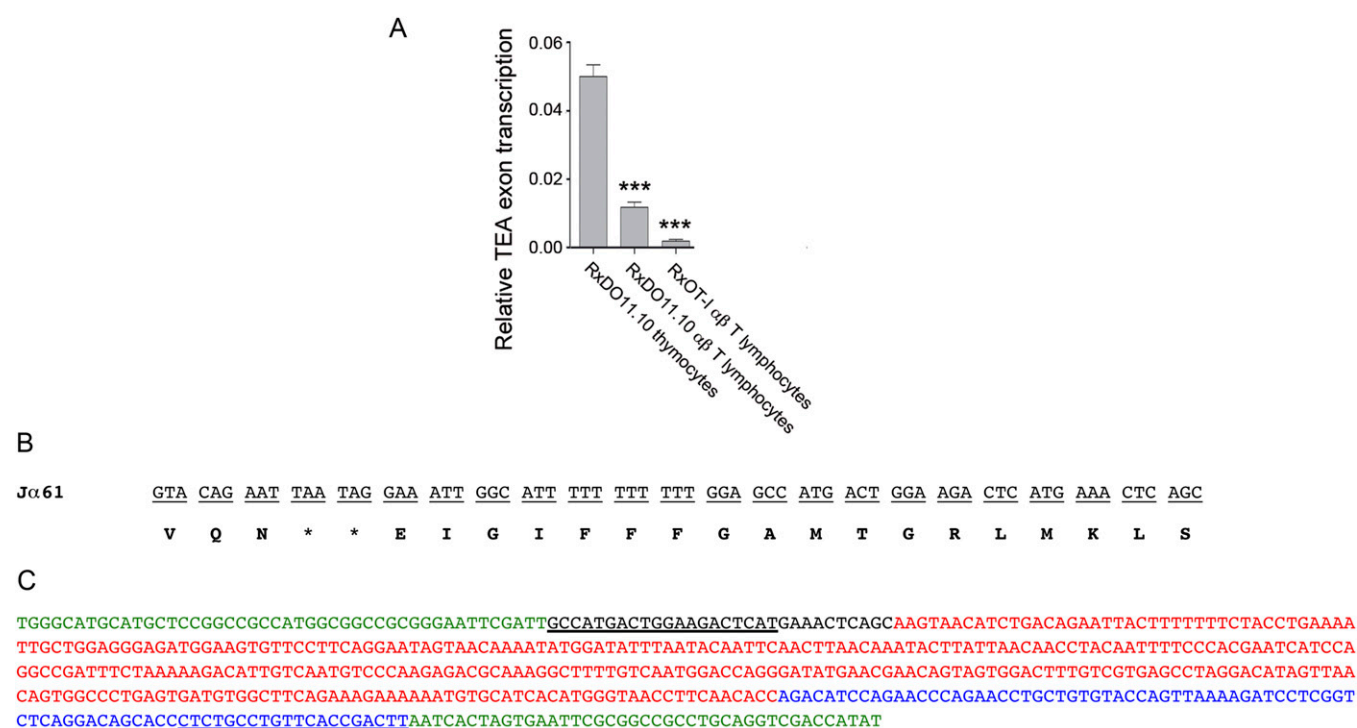

**Fig. S1.** Analysis of TEA exon transcription in RxDO11.10 and *Rag2*<sup>-/-</sup> × OT-I (RxOT-I)  $\alpha\beta$  T lymphocytes and nucleotide/amino acid sequences of the J $\alpha$  gene segments and the J $\alpha$ 61 transcripts analyzed in this study. (A) Analysis of TEA exon transcription in RxDO11.10 and RxOT-I thymocytes and peripheral T lymphocytes by RT-qPCR. The results were normalized to those for *Actb* and represent the mean  $\pm$  SEM of duplicate RT-qPCR from three independent experiments. Two-tailed Student's *t* tests were used to determine the statistical significance between the values of the RT-qPCRs from RxDO11.10 thymocytes versus RxDO11.10 and RxOT-I T lymphocytes (\*\*\*) *P* < 0.0005). (B) Sequence of the J $\alpha$ 61 transcripts. (C) The J $\alpha$ 61 PCR product obtained by RT-PCR was subcloned into the pGEM-T plasmid to be sequenced using the M13 forward and reverse primers (Promega). Six of six independent clones were sequenced, and the same sequence was obtained in the analysis of all clones. The plasmid pGEM backbone sequence is represented in green; the J $\alpha$ 61 gene segment sequence is represented in black; the genomic region downstream of the J $\alpha$ 61 gene segment that is spliced onto the first exon of the C $\alpha$  region is represented in red; the first C $\alpha$  exon sequence is represented in blue. The sequences of the primers used to amplify the J $\alpha$ 61 transcripts are underlined.

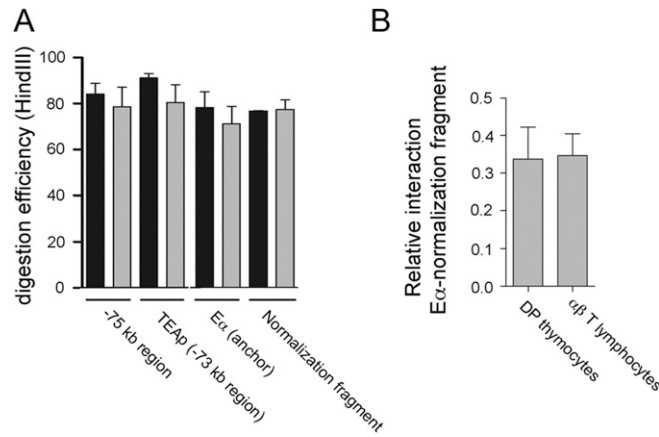

**Fig. S2.** Determination of HindIII digestion efficiency and relative interaction analysis of E $\alpha$  with the normalization fragment from RxDO11.10 cells. (A) Digestion efficiencies at the indicated genomic fragments obtained from DP thymocyte-derived DNA HindIII digestions are represented as black bars, and those obtained from the HindIII digestion of DNA derived from T lymphocytes are represented as gray bars. The digestion efficiency was calculated according to a published protocol (1). Primers used for the determination of restriction efficiency are listed in Table S1. (B) Determination of relative interaction of E $\alpha$  with the control -75 kb region measured by qPCR in DP thymocyte and T lymphocyte HindIII-digested and ligated DNA. Primers used are listed in Table S1. The results represent the mean  $\pm$  SEM of duplicate qPCRs of three independent experiments.

1. Hagège H, et al. (2007) Quantitative analysis of chromosome conformation capture assays (3C-qPCR). *Nat Protoc* 2(7):1722–1733.

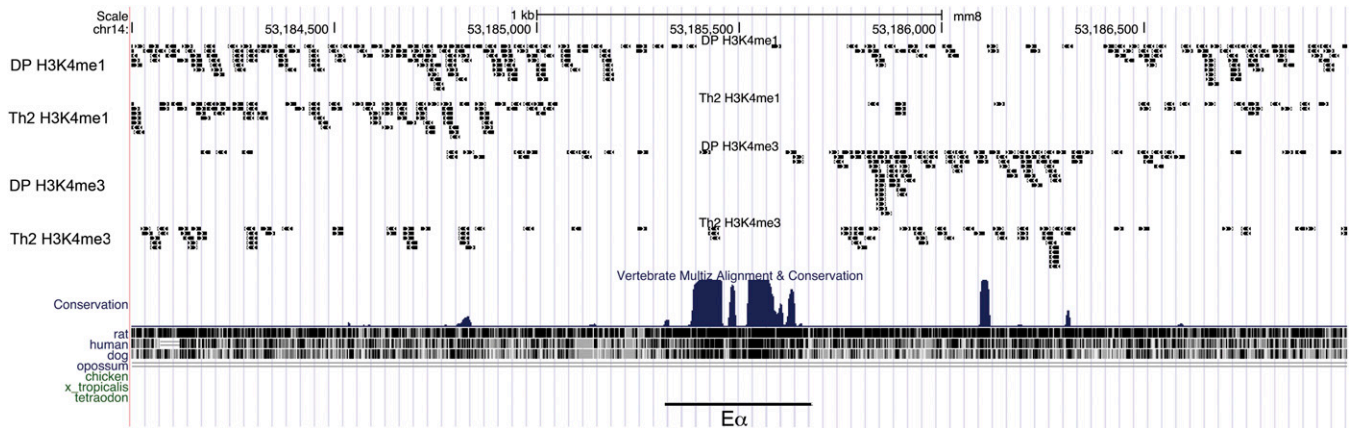

**Fig. S3.** Comparative H3K4me1 and H3K4me3 analyses in DP thymocytes and Th2 lymphocytes from WT mice by ChIP-seq. A public database of H3K4me1 and H3K4me3 results obtained from ChIP-seq experiments performed in WT DP thymocytes and Th2 cells (data from ref. 1) was analyzed. The figure shows a screenshot of the UCSC Mouse mm8 Genome Browser (data from ref. 2) with the alignments of the reads obtained from the different samples downloaded as BED files. The genomic location of E $\alpha$  (T $\alpha$ 1–T $\alpha$ 4 core region) is also indicated.

1. Wei G, et al. (2011) Genome-wide analyses of transcription factor GATA3-mediated gene regulation in distinct T cell types. *Immunity* 35(2):299–311.  
 2. Karolchik D, et al. (2004) The UCSC Table Browser data retrieval tool. *Nucleic Acids Res* 32(Database issue):D493–D496.

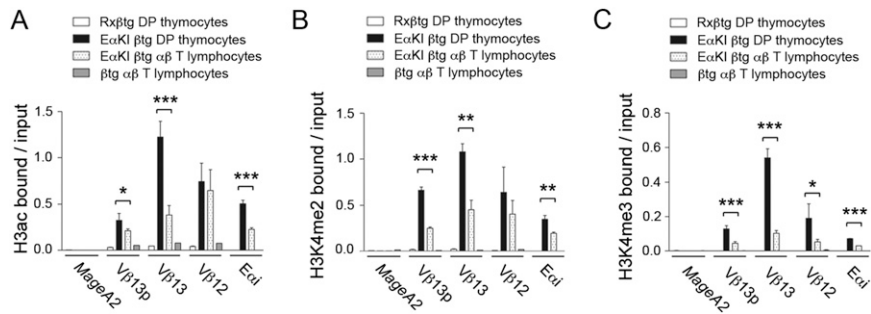

**Fig. 54.** Comparative H3ac, H3K4me2, and H3K4me3 analyses in DP thymocytes and T lymphocytes from EαK1 alleles by qChIP. Analysis of indicated histone H3Ac (A), H3K4me2 (B), and H3K4me3 (C) at Vβ13p, Vβ13, and Vβ12 gene segments, and EαI in DP thymocytes from Rxβtg and EαK1 Rxβtg mice, and T lymphocytes from EαK1 βtg and βtg mice. *MageA2*, negative control (1). Data represent the mean ± SEM of duplicate qPCR analysis of three independent experiments. Two-tailed Student's *t* test were used to determine the statistical significance between the values of the qChIPs from DP thymocytes versus T lymphocytes (\**P* < 0.05, \*\**P* < 0.005, and \*\*\**P* < 0.0005).

1. Hao B, Krangel MS (2011) Long-distance regulation of fetal Vδ gene segment TRDV4 by the *Tcrd* enhancer. *J Immunol* 187(5):2484–2491.

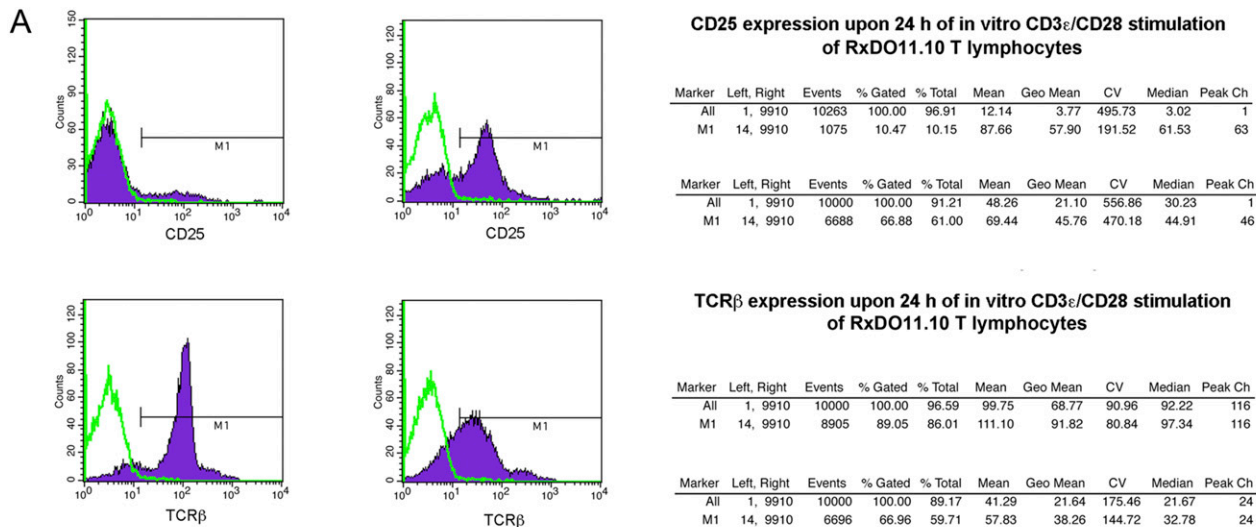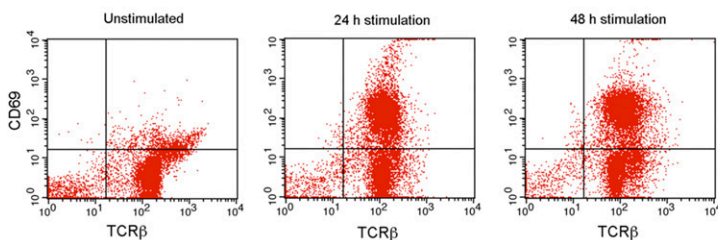

| Marker | Left | Right | Events | % Gated | % Total | Mean   | Geo Mean | CV     | Median | Peak Ch |
|--------|------|-------|--------|---------|---------|--------|----------|--------|--------|---------|
| All    | 1    | 9910  | 10544  | 122.70  | 96.95   | 197.67 | 25.77    | 429.03 | 37.18  | 1       |
| M1     | 28   | 9910  | 5522   | 64.26   | 50.77   | 372.16 | 150.61   | 307.49 | 137.00 | 9910    |

  

| Marker | Left | Right | Events | % Gated | % Total | Mean   | Geo Mean | CV     | Median | Peak Ch |
|--------|------|-------|--------|---------|---------|--------|----------|--------|--------|---------|
| All    | 1    | 9910  | 10000  | 116.37  | 91.95   | 149.44 | 31.19    | 412.45 | 39.95  | 1       |
| M1     | 28   | 9910  | 5248   | 61.07   | 48.25   | 278.19 | 159.75   | 298.39 | 162.53 | 143     |

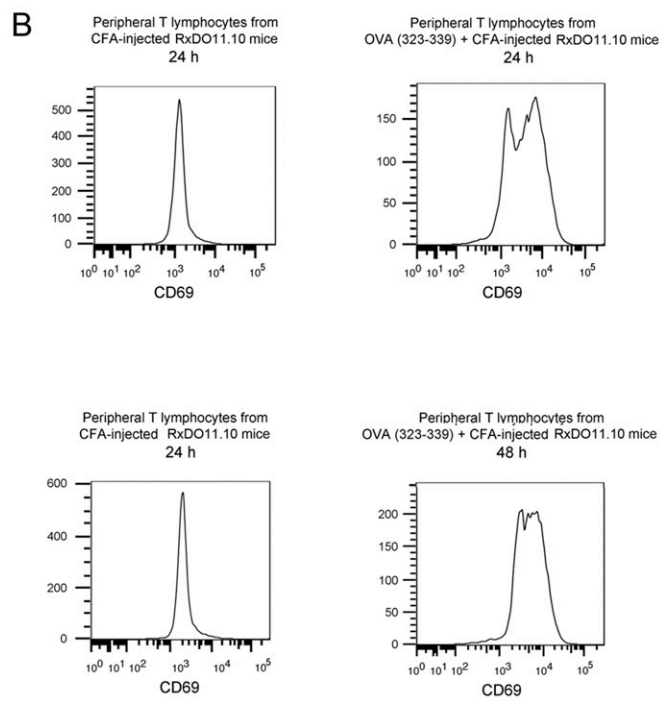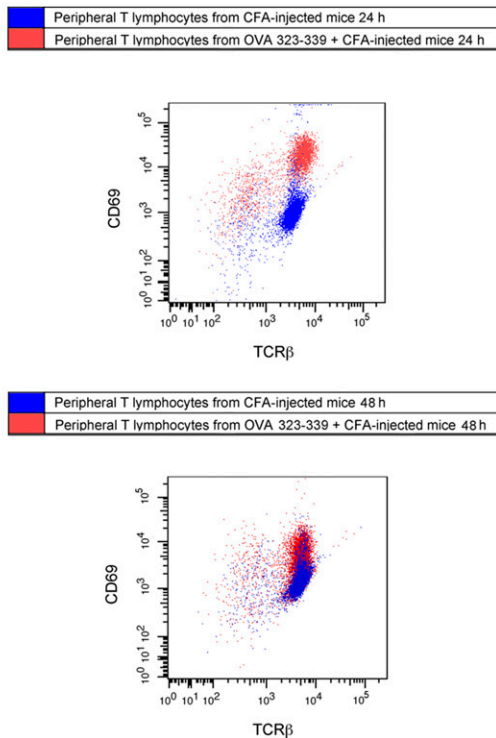

**Fig. S5.** Measure of CD25, TCR $\beta$ , and CD69 upon TCR-mediated stimulation of T lymphocytes by flow cytometry. (A) CD25 and CD69 expression is up-regulated, whereas TCR $\beta$  expression is down-regulated upon in vitro TCR-mediated stimulation of T lymphocytes. CD25, TCR $\beta$ , and CD69 expression was analyzed by flow cytometry in unstimulated and plate-bound CD3 $\epsilon$  and CD28 Ab-stimulated RxDO11.10 T lymphocytes. The green line represents staining with the control Ab, and the purple graphic represents staining with specific CD25 or TCR $\beta$  Abs after 24 h of stimulation. Similar TCR $\beta$ /CD69 double-expression patterns were observed upon 24 h and 48 h of T lymphocyte stimulation. (B) CD69 expression is up-regulated upon in vivo TCR-mediated stimulation of T lymphocytes. CD69 up-regulation is maximal at 24 h after OVA 323-339 + CFA-immunization, whereas it is down-modulated 48 h after immunization.

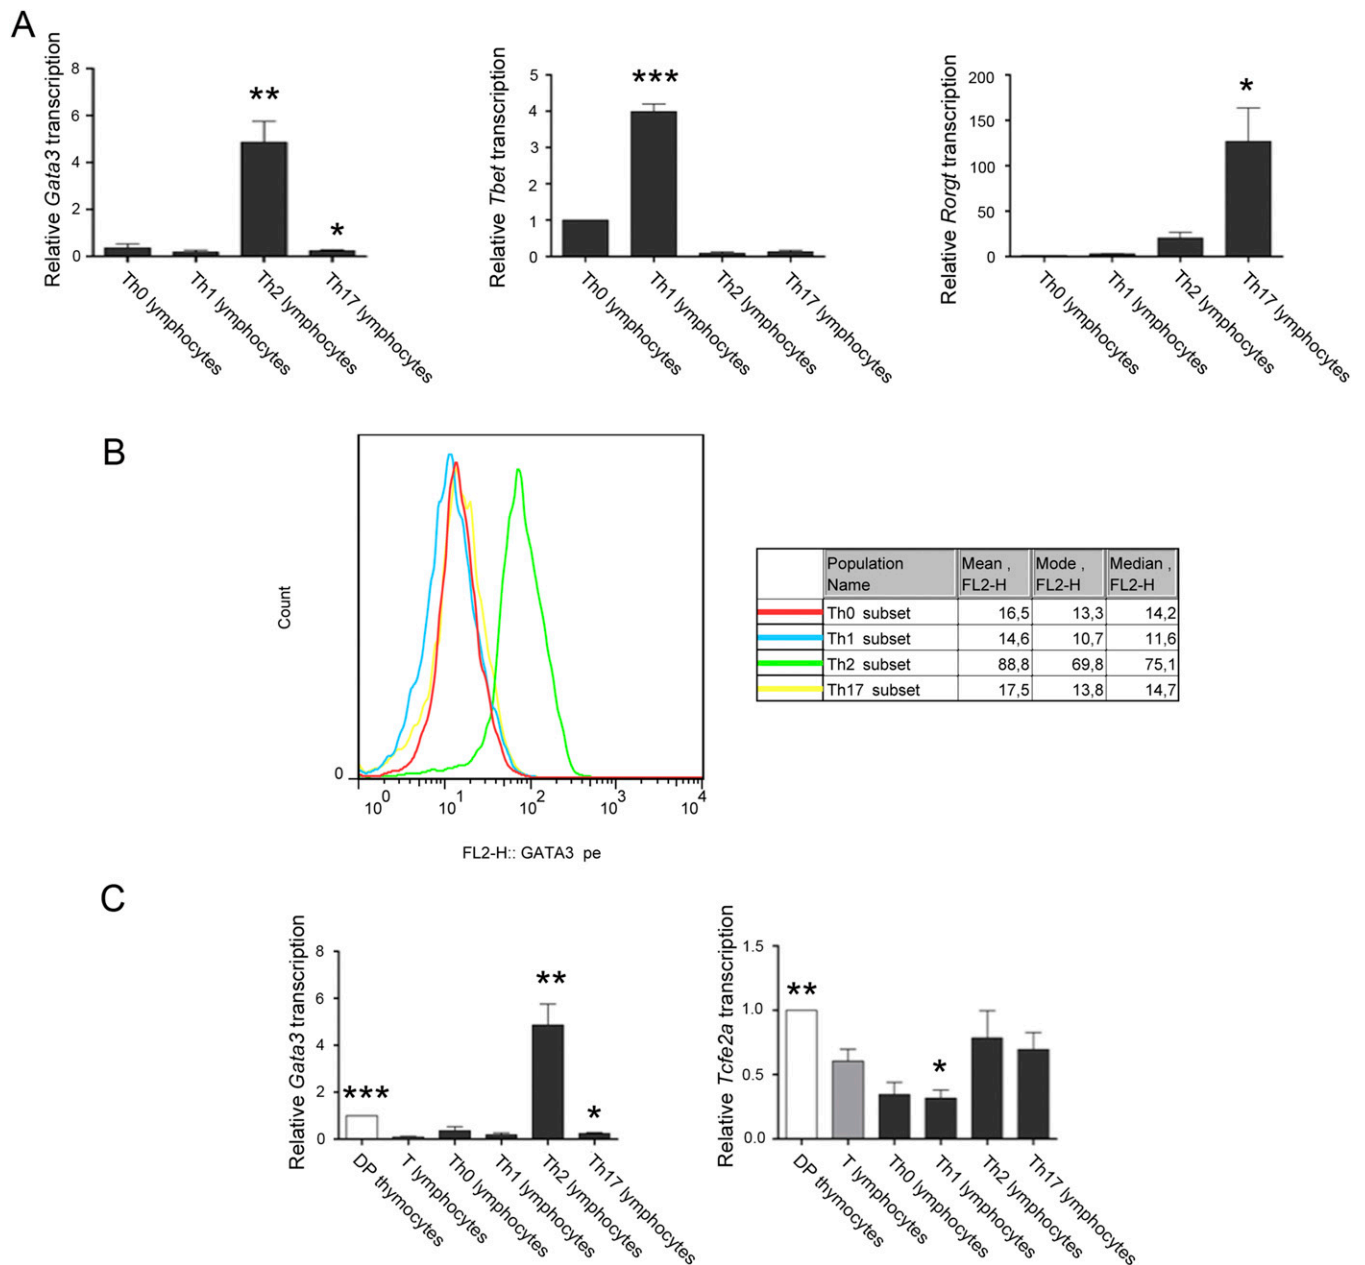

**Fig. S6.** Measure of *Gata3*, *Tbet*, *Rorgt*, and *Tcf2a* transcription upon Th differentiation. (A) Analysis of *Gata3*, *Tbet*, and *Rorgt* transcripts in Th0, Th1, Th2, and Th17 cell populations from RxDO11.10 mice by RT-qPCR. (B) Comparative analysis by flow cytometry of intracellular GATA-3 expression in Th0 (red), Th1 (1), Th2 (green), and Th17 (yellow) cells. (C) Analysis of *Gata3* and *Tcf2a* transcripts in sorted DP thymocytes, T lymphocytes, and Th0, Th1, Th2, and Th17 cell populations from RxDO11.10 mice by RT-qPCR. The results were normalized to those for *Actb* and represent the mean  $\pm$  SEM of duplicate RT-qPCR from three independent experiments. Two-tailed Student's *t* tests were used to determine the statistical significance between the values of the RT-qPCRs from Th0 vs. Th populations in A and T lymphocytes vs. DP thymocytes or Th populations C (\* $P < 0.05$ , \*\* $P < 0.005$ , and \*\*\* $P < 0.0005$ ).

1. Takeda S, Rodewald H-R, Arakawa H, Bluethmann H, Shimizu T (1996) MHC class II molecules are not required for survival of newly generated CD4<sup>+</sup> T cells, but affect their long-term life span. *Immunity* 5(3):217-228.

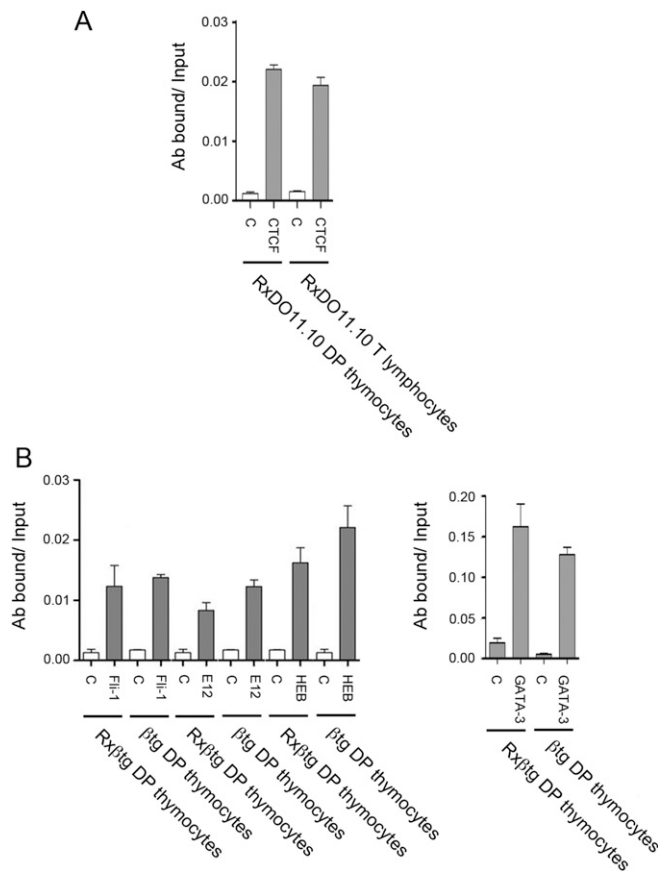

**Fig. 57.** Comparative CTCF binding analysis to TEAP in DP thymocytes and T lymphocytes, and Fli-1, E-12, HEB, and GATA-3 binding analyses in DP thymocytes from unrearranged and rearranged *Tcrα* alleles by qChIP. (A) Analysis of CTCF binding to TEAP in DP thymocytes and T lymphocytes from RxDO11.10 mice. (B) Analysis of the indicated TF binding to E $\alpha$  in DP thymocytes from Rxβtg mice (unrearranged *Tcrα* alleles) and βtg mice (rearranged *Tcrα* alleles) using the control (c) or indicated Abs. DNA purified from the input and Ab-bound fractions was used as a template for qPCR to evaluate the presence of TEAP and E $\alpha$ . The results are representative of three independent experiments.

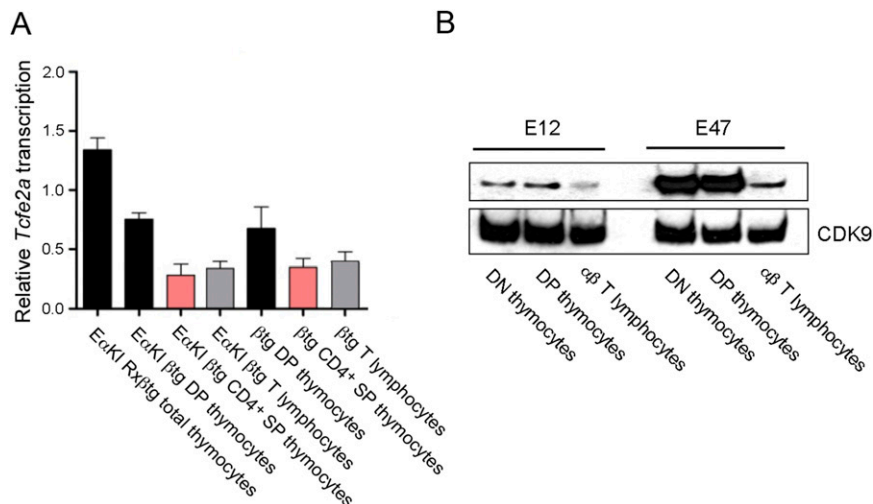

**Fig. 58.** E2A expression is down-regulated in peripheral T lymphocytes compared with DP thymocytes. (A) Analysis of *Tcfe2a* (E2A) transcription in DP thymocytes from E $\alpha$ KI Rxβtg mice, sorted DP and CD4<sup>+</sup> SP thymocyte populations and peripheral T lymphocytes from E $\alpha$ KI βtg and βtg mice by RT-qPCR. Transcript level was normalized to that of *Actb* in each sample. (B) Western blot of the E2A isoforms E12 and E47 present in DN3 thymocytes from *Rag2*<sup>-/-</sup> mice, DP thymocytes from Rxβtg mice, and peripheral T lymphocytes from βtg mice. The presence of cyclin-dependent kinase 9 (CDK9) was analyzed as loading control.



**Table S1. Sequence of oligonucleotides used as PCR primers**

| Gene or transcript and application  | Primer sequence                                              |
|-------------------------------------|--------------------------------------------------------------|
| RT-qPCR                             |                                                              |
| <i>Actb</i>                         | 5'- ACACCCGCCACCAGTTC<br>5'- TACAGCCCGGGGAGCAT               |
| <i>Tcfe2a</i>                       | 5'- CAGATGGTGGCCTGGATACT<br>5'- CATCCCTGCTGTAGCTGTCA         |
| <i>Gata3</i>                        | 5'- GAGGTGGTGTCTGCATTCCAA<br>5'- TTTCACAGCACTAGAGACCCTGTTA   |
| <i>hE47</i>                         | 5'- CAGTTCGGAGGTTTCAGGTCTT<br>5'- AGAGGCTGCTGTGCGACT         |
| <i>Tbet</i>                         | 5'- AGCAAGGACGCGCAATGTT<br>5'- GGGTGGACATATAAGCGGTTT         |
| <i>Rorgt</i>                        | 5'- CCGCTGAGAGGGCTTCAC<br>5'- TGCAGGAGTAGGCCACATTACA         |
| V $\alpha$ transcripts              |                                                              |
| TRAV21                              | 5'- CAATAGCCAGGAAAGCCATAC<br>5'- TAGCCACGCCACAATCAGT         |
| TRAV17                              | 5'- GCCTCCAGTTTCTCTCAAA<br>5'- GCTGGGGATTTCTCAGGTT           |
| TEA transcripts                     |                                                              |
| TEA exon                            | 5'- TCCAAGATTCCTGGGGACAAC<br>5'- AAGCAGGAGCCTTTGCATTA        |
| Spliced J $\alpha$ transcripts      |                                                              |
| J $\alpha$ 61                       | 5'- GCCATGACTGGAAGACTCAT                                     |
| J $\alpha$ 58                       | 5'- TGGGTCTAAGCTGTCATTTGG                                    |
| J $\alpha$ 47                       | 5'- GCTTGGGAACCATTTTGAGA                                     |
| C $\alpha$                          | 5'- AAGTCGGTGAACAGGCAGAG                                     |
| V $\beta$ transcripts               |                                                              |
| V $\beta$ 11                        | 5'- AAGGAACGATTCTCAGCTC<br>5'- CTCTGTGCTAAGCTGCTT            |
| V $\beta$ 12                        | 5'- TCAGCTGTGTATCTGTGTG<br>5'- AAAGTTCAGAACTGGTGGG           |
| V $\beta$ 13                        | 5'- ACAGCCACCTATCTCTGT<br>5'- GGAGTATAAGAAATAGTCCC           |
| qChIP                               |                                                              |
| J $\alpha$ 61                       | 5'- GCCATGACTGGAAGACTCAT<br>5'- TCCATATTTTGTACTATTCTGAAG     |
| J $\alpha$ 58                       | 5'- TGGGTCTAAGCTGTCATTTGG<br>5'- TTGACTGGACTTGAATTTTGG       |
| J $\alpha$ 47                       | 5'- GCTTGGGAACCATTTTGAGA<br>5'- CACCTGGAGCTTTGTTGTTT         |
| E $\alpha$                          | 5'- AGCCCTGCTTTGGGTAAAA<br>5'- CCATTTCTGTTCTACTTCTGG         |
| E $\alpha$ CTCF                     | 5'- AGGAAGTCGCAGAACCTGAA<br>5'- CGTAGGATGCAGGGATTTTC         |
| TEAp                                | 5'- ATGGGAAAGGGACCGATAAG<br>GCTCAAAGGACACTGGAAGG             |
| V $\beta$ 13p                       | 5'- CTTACCATTCCCTATGGAAGTTCAG<br>5'- CATATGCACAGACTGCATGTGAG |
| V $\beta$ 13                        | 5'- ACAGCCACCTATCTCTGT<br>5'- GGAGTATAAGAAATAGTCCC           |
| V $\beta$ 12                        | 5'- TCAGCTGTGTATCTGTGTG<br>5'- AAAGTTCAGAACTGGTGGG           |
| E $\alpha$ KI - 1                   | 5'- ACCACACATATGTGTAGAGTC<br>5'- ATCTGACCAGCTTACCCATTTT      |
| E $\alpha$ KI - 2                   | 5'- TGTCAAATCCAATCTCTTGATGTC<br>5'- CCATTTCTGTTCTACTTCTGG    |
| <i>MageA2</i>                       | 5'- AACGTTTTGTGAACGTCCTGAG<br>5'- GACGCTCCAGAACAAAATGGC      |
| <i>Actb promoter</i>                | 5'- CGCCATGGATGACGATATCG<br>5'- CGAAGCCGGCTTTGCACATG         |
| 2-Oct                               | 5'- CGGGTGTGAGAGGTGTGG<br>5'- CGAGTCTGAAGCAAGCCAGT           |
| HindIII digestion efficiency and 3C |                                                              |
| TEAp                                | 5'- GCGGATTTGGGCAAGAATAA (3C)                                |



**Table S1. Cont.**

| Gene or transcript and application | Primer sequence                 |
|------------------------------------|---------------------------------|
| E $\alpha$                         | 5'-CACAGGCTGCTCCAGAGATG         |
|                                    | 5'- AGCATGGGAGACAGACGTAATG (3C) |
| Normalization                      | 5'-ATTCCGGTCTCCGTGTGAAT         |
|                                    | 5'- GGCAAAATCAGAAGACAAGATG (3C) |
| -75 region                         | 5'- GCAGGAGTCGGTCTTTCC          |
|                                    | 5'- CTGCCAAAAGAGAGCTTGG (3C)    |
|                                    | 5'- GCATGTGAATGAGAGAGGATGG      |

The primer for J $\alpha$ 49 transcripts was previously described (1). The primers for V $\beta$ 11, V $\beta$ 13, and V $\beta$ 12 germ-line transcription were described as primers for ChIP experiments of the gene segments (2). The primers for *Actb*, *Gata3*, and *Tcf2a* were described (3–5). The primers for qChIP of E $\alpha$ i-1, V $\beta$ 13p, V $\beta$ 13, and V $\beta$ 12 were described (2). The E $\alpha$ i-1 primers were used in the qChIP experiments performed with mononucleosomes (Fig. S4), whereas the E $\alpha$ i-2 primers were used in the qChIP experiments performed with sonicated chromatin (Figs. 4 and 6). The *MageA2* and *Oct2* primers were described for qChIP (6, 7). The HindIII digestion efficiency and 3C primers for TEAp, E $\alpha$ , and -75 region were described (8). Each pair of primers was used for HindIII digestion efficiency determinations, whereas the primers labeled 3C were used for 3C experiments.

1. Abarrategui I, Krangel MS (2006) Regulation of T cell receptor- $\alpha$  gene recombination by transcription. *Nat Immunol* 7(10):1109–1115.
2. Jackson A, Kondilis HD, Khor B, Sleckman BP, Krangel MS (2005) Regulation of T cell receptor  $\beta$  allelic exclusion at a level beyond accessibility. *Nat Immunol* 6(2):189–197.
3. Dionne CJ, et al. (2005) Subversion of T lineage commitment by PU.1 in a clonal cell line system. *Dev Biol* 280(2):448–466.
4. David-Fung ES, et al. (2009) Transcription factor expression dynamics of early T-lymphocyte specification and commitment. *Dev Biol* 325(2):444–467.
5. Yui MA, Rothenberg EV (2004) Deranged early T cell development in immunodeficient strains of nonobese diabetic mice. *J Immunol* 173(9):5381–5391.
6. Hao B, Krangel MS (2011) Long-distance regulation of fetal V $\delta$  gene segment TRDV4 by the *Tcrd* enhancer. *J Immunol* 187(5):2484–2491.
7. del Blanco B, García-Mariscal A, Wiest DL, Hernández-Munain C (2012) *Tcr* enhancer activation by inducible transcription factors downstream of pre-TCR signaling. *J Immunol* 188(7):3278–3293.
8. Seitan VC, et al. (2011) A role for cohesin in T-cell-receptor rearrangement and thymocyte differentiation. *Nature* 476(7361):467–471.
